# Supplementary material for: End-of-life care in oxygen-dependent ILD compared with lung cancer: a national population-based study
Source: HighWire-hosted journal article supplement (doi:10.1136/thoraxjnl-2015-207439), 2016-02-10
Supplement: thoraxjnl-2015-207439supp1.pdf [file thoraxjnl-2015-207439supp1.pdf]

**Online supplementary material:**

**Table E1. Baseline characteristics of 490 ILD patients with LTOT and death between January 1, 2011 and October 14, 2013 registered in SRPC (study patients) and those not registered in SRPC.**

| <b>Characteristic</b>                | <b>ILD patient registered in SRPC, n = 285</b> | <b>ILD patient not registered in SRPC, n = 205</b> |
|--------------------------------------|------------------------------------------------|----------------------------------------------------|
| Age, years (at LTOT start)           | 77.0 ± 8                                       | 74.9 ± 8                                           |
| Female, n (%)                        | 112 (39)                                       | 62 (30)                                            |
| FEV <sub>1</sub> , L                 | 1.58 ± 0.6                                     | 1.68 ± 0.6                                         |
| FEV <sub>1</sub> % pred*             | 60 (50-80)                                     | 67 (52-78)                                         |
| BMI, kg/m <sup>2</sup>               | 25.1 ± 4.8                                     | 25.8 ± 4.7                                         |
| PaO <sub>2</sub> breathing air, kPa  | 6.6 ± 1.1                                      | 6.5 ± 1.0                                          |
| PaCO <sub>2</sub> breathing air, kPa | 5.0 ± 0.9                                      | 5.0 ± 1.0                                          |

Data presented as mean ± SD unless otherwise specified.

\* Median (first quartile – third quartile).

Abbreviations: SRPC, Swedish Registry of Palliative Care; FEV<sub>1</sub>, forced expiratory volume in one second; FEV<sub>1</sub>% pred, forced expiratory volume in one second of predicted value, percentage; PaO<sub>2</sub> (air), arterial blood gas tension of oxygen on air; PaCO<sub>2</sub> (air), arterial blood gas tension of carbon dioxide on air.

**Table E2: Percentage of responses of “missing responses” to symptom prevalence at the end of life.**

| <b>Symptom</b> | <b>ILD</b> | <b>Lung cancer</b> |
|----------------|------------|--------------------|
| Breathlessness | 21%        | 9%                 |
| Death rattle   | 18%        | 7%                 |
| Pain           | 20%        | 8%                 |
| Anxiety        | 28%        | 14%                |
| Nausea         | 23%        | 14%                |
| Confusion      | 26%        | 14%                |

Patients with oxygen-dependent ILD (n=285) or lung cancer (n=10,822).

**Table E3: Prevalence of ‘as needed’ medication prescriptions at EOL in symptomatic patients with oxygen-dependent ILD vs lung cancer.**

| “As needed”<br>prescription | ILD     |          | Lung cancer |            | p-value<br>(chi-squared test) |
|-----------------------------|---------|----------|-------------|------------|-------------------------------|
|                             | Total n | n (%)    | Total n     | n (%)      |                               |
| Death rattle                | 102     | 90 (88)  | 6,318       | 5,978 (95) | < 0.001                       |
| Pain                        | 117     | 107 (92) | 7,812       | 7,628 (98) | < 0.001                       |
| Anxiety                     | 138     | 127 (92) | 5,882       | 5,580 (95) | < 0.001                       |
| Nausea                      | 31      | 20 (65)  | 1,497       | 1,280 (86) | < 0.001                       |

Patients with oxygen-dependent ILD (n=285) or lung cancer (n=10,822).
